# Supplementary material for: Fast Reduced Graphene-Based Membranes with High Desalination Performance
Source: MDPI journal article supplement (doi:10.3390/membranes11110846), 2021-10-29
Supplement: s1 [file s1]

## Supporting Information

# Fast Reduced Graphene-Based Membranes with High Desalination Performance

Shanshan Liang<sup>1,\*</sup>, Liuyuan Zhu<sup>1</sup>, Shuai Wang<sup>1</sup>, Liang Chen<sup>2</sup> and Haiping Fang<sup>1</sup>

<sup>1</sup> School of Physics, East China University of Science and Technology, Shanghai 200237, China; zhuly666@126.com (L.Z.); wangshuai0008@outlook.com (S.W.); fanghaiping@sinap.ac.cn (H.F.)

<sup>2</sup> Department of Optical Engineering, Zhejiang Prov Key Lab Carbon Cycling Forest Ecosy, College of Environmental and Resource Sciences, Zhejiang A&F University, Hangzhou 311300, China; liangchen@zafu.edu.cn

\* Correspondence: liangshanshan@ecust.edu.cn

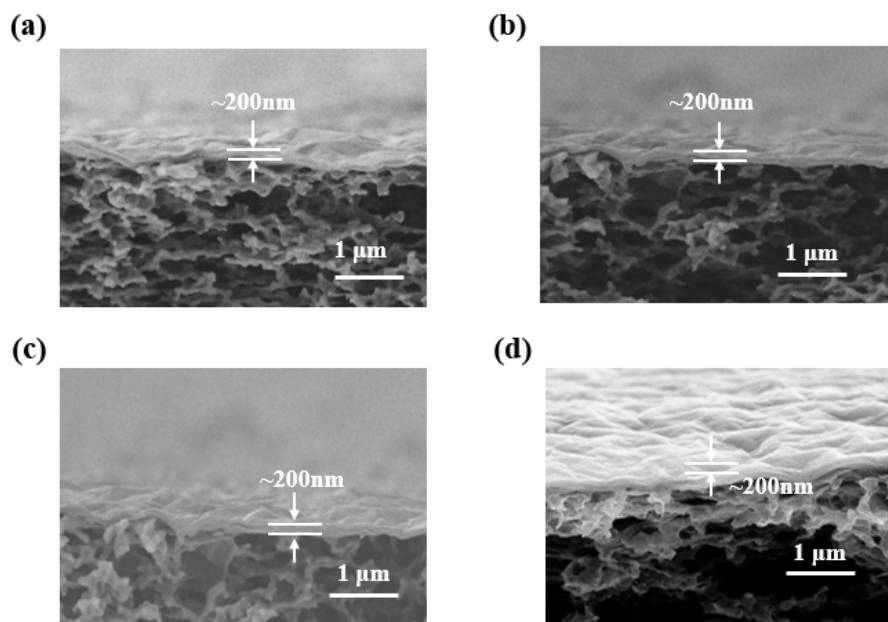

**Figure S1.** Cross-sectional SEM images of (a) GO membrane, (b) WRGO membrane, (c) MRGO membrane and (d) FRGO membrane.

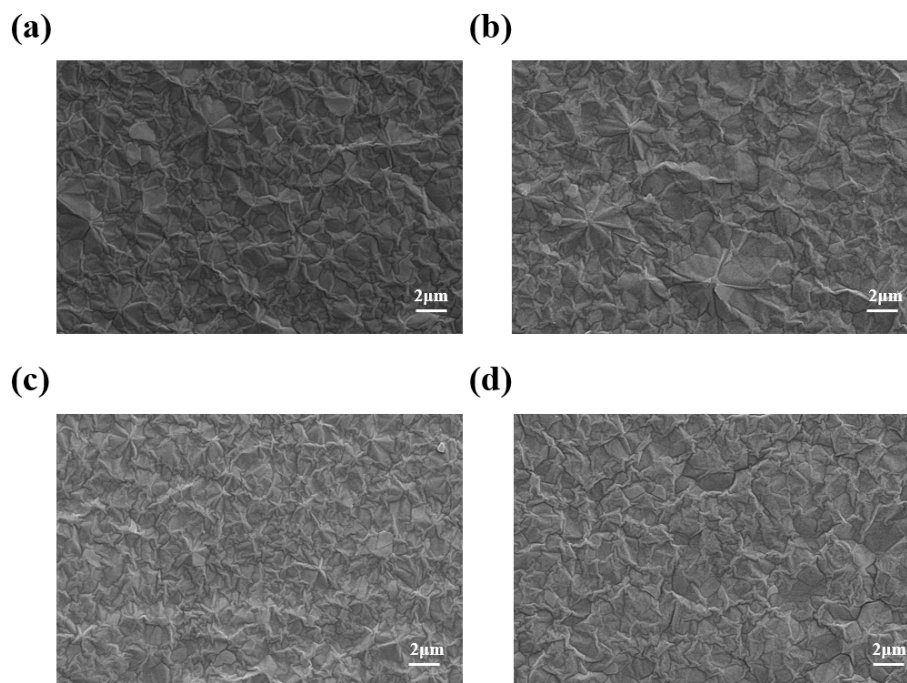

**Figure S2.** Surface SEM images of (a) GO membrane, (b) WRGO membrane, (c) MRGO membrane, and (d) FRGO membrane.

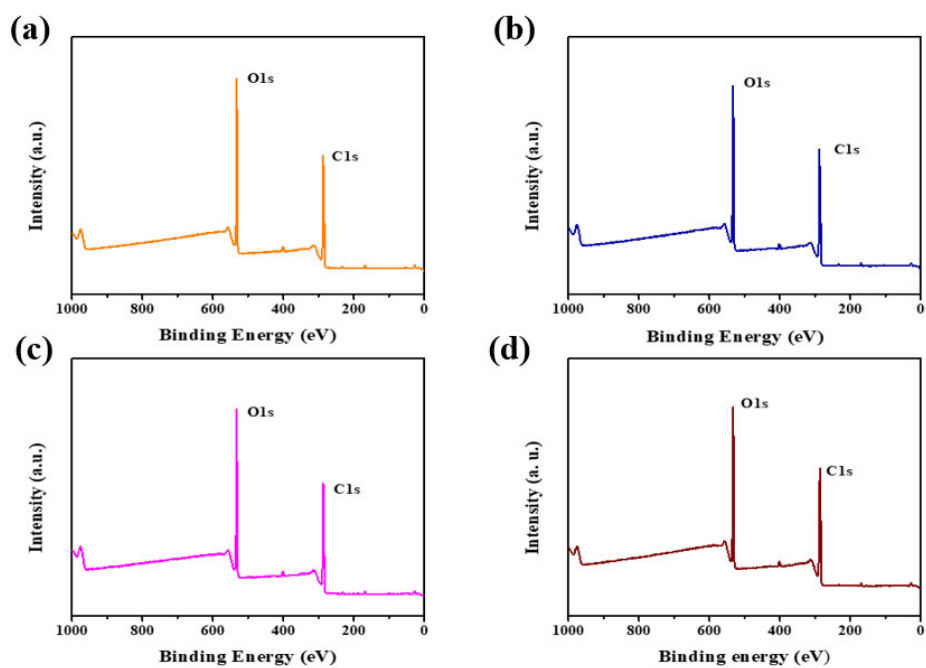

**Figure S3.** XPS spectra of (a) GO membrane, (b) WRGO membrane, (c) MRGO, and (d) FRGO membrane over a wide scanning range.

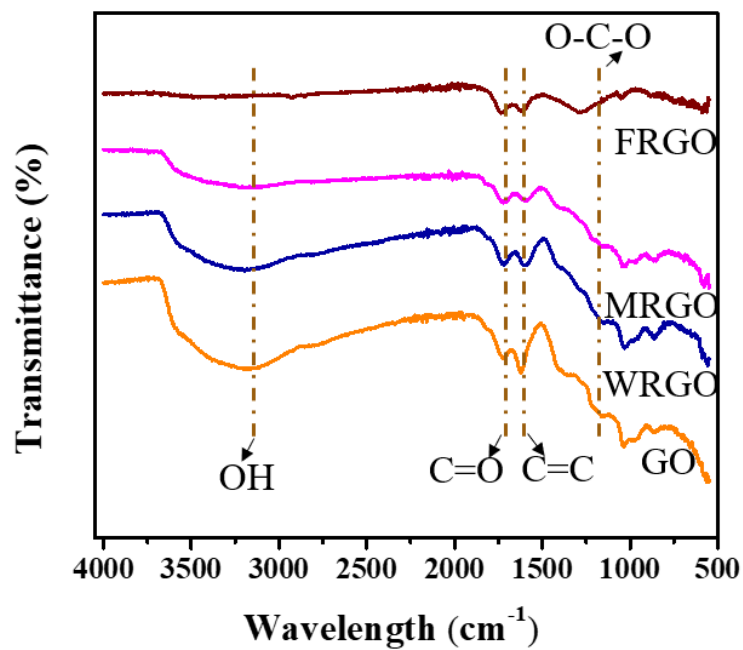

**Figure S4.** FTIR spectra of GO membrane, WRGO membrane, MRGO membrane, and FRGO membrane.

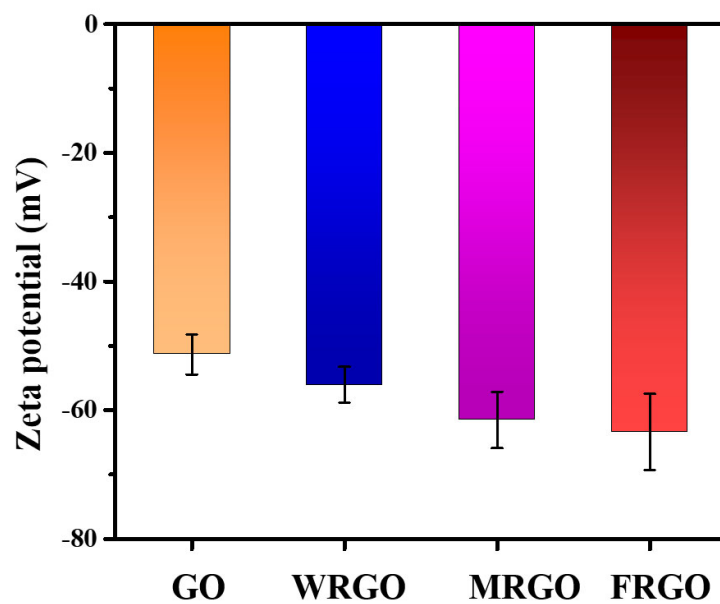

**Figure S5** Zeta potential analysis of the GO membrane, WRGO membrane, MRGO membrane, and FRGO membranes.

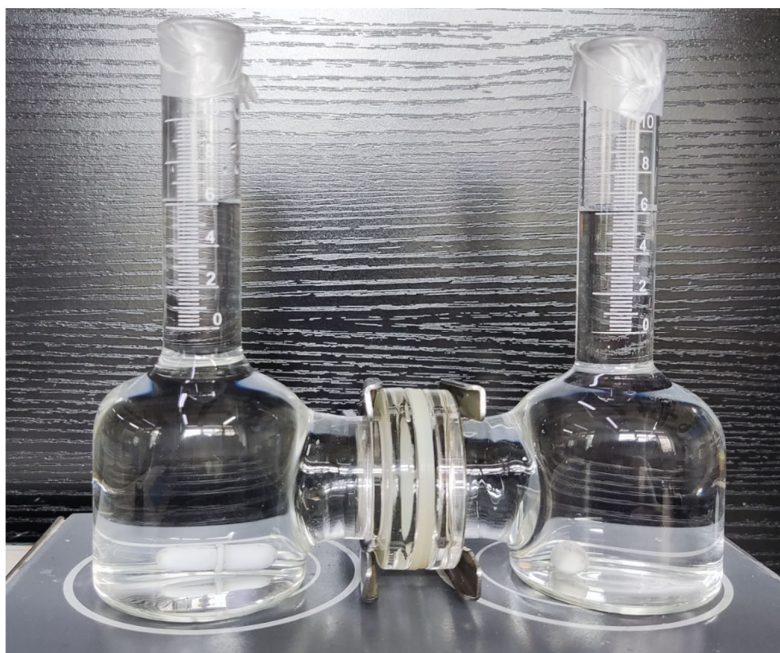

**Figure S6.** Photograph of a two-chamber diffusion cell. The H-type cell consists of feed and permeate sides; the membrane is located between them.

**Supplementary Table S1.** Comparison with other GO-based membranes.

| Membrane type                      | Thickness | Na <sup>+</sup> permeation rate<br>(mmol m <sup>-2</sup> h <sup>-1</sup> ) | Water Permeance<br>(L m <sup>-2</sup> h <sup>-1</sup> ) | P <sub>w</sub> /l |
|------------------------------------|-----------|----------------------------------------------------------------------------|---------------------------------------------------------|-------------------|
| GO <sup>S3</sup>                   | 280       | 0.7184                                                                     | 0.85                                                    | 65                |
| GO <sup>S4</sup>                   | 303       | 0.52                                                                       | 0.66                                                    | 70                |
| GO <sup>S3</sup>                   | 750       | 0.19                                                                       | 0.17                                                    | 49                |
| rGO <sup>S3</sup>                  | 280       | 0.301                                                                      | 0.57                                                    | 105               |
| K-controlled GO <sup>S3</sup>      | 750       | 0.0048                                                                     | 0.36                                                    | 4166              |
| K-controlled RGO <sup>S3</sup>     | 280       | 0.0629                                                                     | 0.22                                                    | 194               |
| NH <sub>3</sub> -rGO <sup>S4</sup> | 303       | 0.054                                                                      | 0.41                                                    | 422               |
| HI-rGO <sup>S4</sup>               | 303       | 0.0059                                                                     | 0.011                                                   | 104               |
| 0.4-R <sup>S5</sup>                | 289       | 9.8                                                                        | 30.14                                                   | 171               |
| 1.2-R <sup>S5</sup>                | 86.5      | 6.9                                                                        | 86.5                                                    | 220               |
| 2.0-R <sup>S5</sup>                | 45.4      | 1.13                                                                       | 1.45                                                    | 71                |
| GO                                 | ~200      | 0.217                                                                      | 4.04                                                    | 1035              |
| WRGO                               | ~200      | 0.041                                                                      | 2.76                                                    | 3970              |
| MRGO                               | ~200      | 0.033                                                                      | 2.93                                                    | 4646              |
| FRGO                               | ~200      | 0.011                                                                      | 2.46                                                    | 12425             |

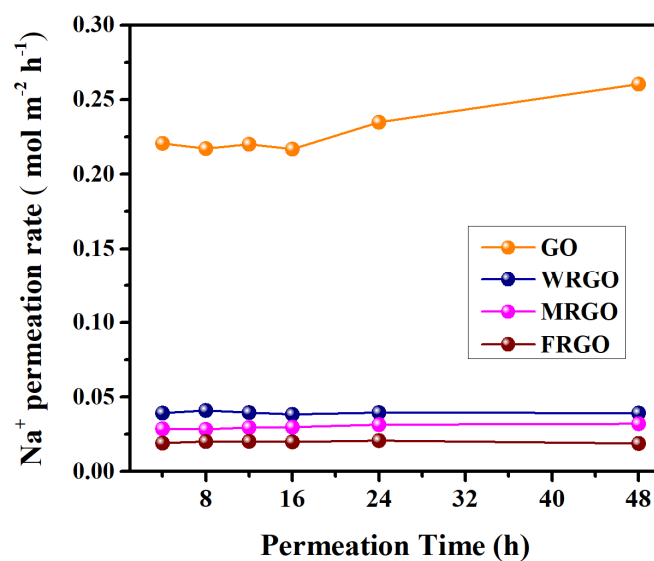

**Figure S7.** The long term of ion permeation rates through GO membrane, WRGO membrane, MRGO membrane, and FRGO membrane.

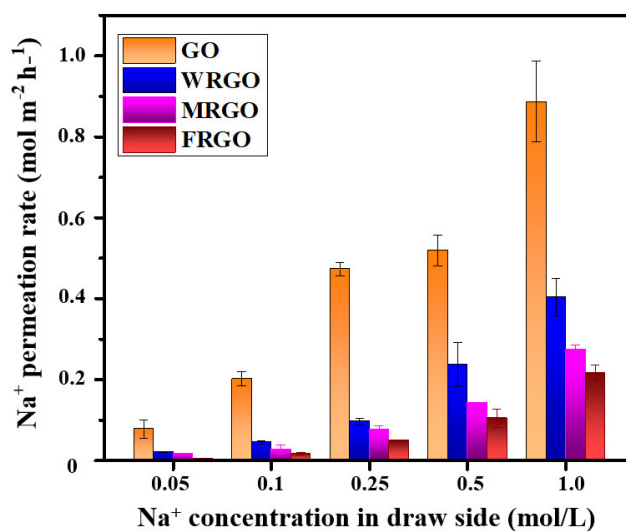

**Figure S8.** The effect of ions concentrations in the draw solution on membrane permeability.

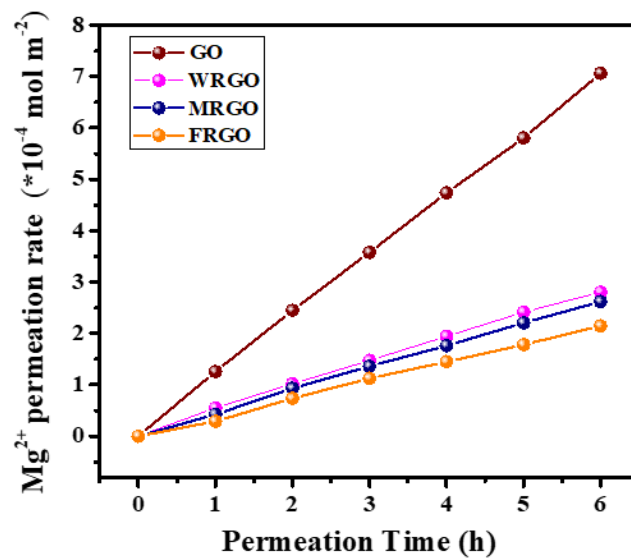

**Figure S9.** The  $\text{Mg}^{2+}$  ion permeation rate through GO membrane, WRGO membrane, MRGO membrane, and FRGO membrane.

#### References

1. Liang, S. et al. *Sep. Purif. Techn.* **2020**, 241,116738.
2. Dai. F., et al. *Chem. Commun.* **2020**, 56 (95), 15069-15071.
3. Chen, L., et al. *Nature*. **2017**,550, 380-383.
4. Zhao, Z, et al, *ACS Sustainable Chem. Eng.* **2019**, 7(17), 14874-14882.
5. Wang Q., et al, *ACS Appl. Mater. Inter.* **2017**, 9, 22509-22517.
